# Supplementary material for: Methane combustion over Pd/CoAl2O4/Al2O3 catalysts prepared by galvanic deposition
Source: Royal Society of Chemistry journal article supplement (doi:10.1039/c7ra06150a), 2017-01-01
Supplement: c7ra06150a1.pdf [file c7ra06150a1.pdf]

Electronic Supplementary Information (ESI)

Methane Combustion over Pd/CoAl<sub>2</sub>O<sub>4</sub>/Al<sub>2</sub>O<sub>3</sub> Catalysts Prepared by Galvanic Deposition.

Yuji Mahara<sup>a</sup>, Takumi Tojo<sup>a</sup>, Kazumasa Murata<sup>a</sup>, Junya Ohyama<sup>a,b</sup>, Atsushi Satsuma<sup>a,b,\*</sup>

<sup>a</sup> Graduate School of Engineering, Nagoya University, Nagoya 464-8603, Japan.

<sup>b</sup> Unit of Elements Strategy Initiative for Catalysts & Batteries, Kyoto University, Kyoto 615-8530, Japan.

\*E-mail: satsuma@chembio.nagoya-u.ac.jp

Comparison with Previously Reported Catalysts

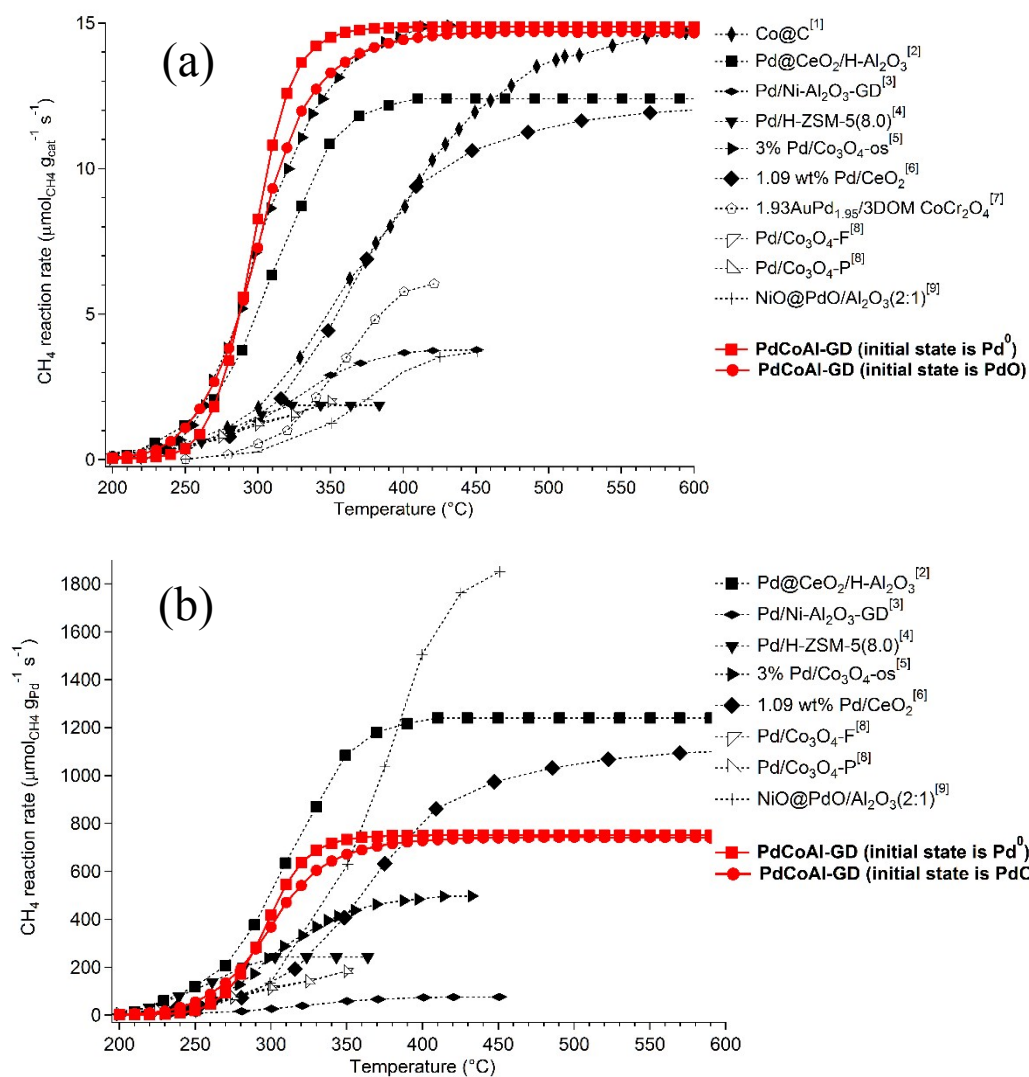

Figure S1. Methane combustion activities for representative catalysts<sup>1-9</sup>. (a) Methane reaction rate per amount of catalyst. (b) Methane reaction rate per amount of Pd.

*Pd particle size effect of TOF of methane combustion*

**Table S1. List of PdCoAl-SI and PdAl-I catalysts with different Pd particle sizes.**

| Catalysts           | Support                                | preparation method      | Calcination    | Pd loading (wt%) | Co loading (wt%) | $d_{Pd-Co}$ (nm) | TOF at 300°C (h <sup>-1</sup> ) <sup>c</sup> |
|---------------------|----------------------------------------|-------------------------|----------------|------------------|------------------|------------------|----------------------------------------------|
| Series of PdCoAl-SI | Al <sub>2</sub> O <sub>3</sub> (sasol) | Sequential Impregnation | 500°C for 3 h  | 0.5 <sup>a</sup> | 5 <sup>a</sup>   | 3                | 63                                           |
|                     | Al <sub>2</sub> O <sub>3</sub> (sasol) | Sequential Impregnation | 500°C for 3 h  | 1 <sup>a</sup>   | 5 <sup>a</sup>   | 3.7              | 71                                           |
|                     | Al <sub>2</sub> O <sub>3</sub> (sasol) | Sequential Impregnation | 500°C for 3 h  | 2 <sup>a</sup>   | 5 <sup>a</sup>   | 6.3              | 304                                          |
|                     | Al <sub>2</sub> O <sub>3</sub> (sasol) | Sequential Impregnation | 900°C for 10 h | 2 <sup>a</sup>   | 5 <sup>a</sup>   | 23.1             | 407                                          |
| Series of PdAl-I    | Al <sub>2</sub> O <sub>3</sub> (sasol) | Impregnation            | 500°C for 3 h  | 1 <sup>a</sup>   | -                | 1.9              | 17                                           |
|                     | Al <sub>2</sub> O <sub>3</sub> (sasol) | Impregnation            | 500°C for 3 h  | 2 <sup>a</sup>   | -                | 3.7              | 160                                          |
|                     | Al <sub>2</sub> O <sub>3</sub> (sasol) | Impregnation            | 800°C for 10 h | 2 <sup>a</sup>   | -                | 5.4              | 164                                          |
|                     | Al <sub>2</sub> O <sub>3</sub> (sasol) | Impregnation            | 850°C for 10 h | 2 <sup>a</sup>   | -                | 7.7              | 197                                          |
|                     | Al <sub>2</sub> O <sub>3</sub> (sasol) | Impregnation            | 900°C for 10 h | 2 <sup>a</sup>   | -                | 19.1             | 290                                          |

<sup>a</sup> Nominal value.

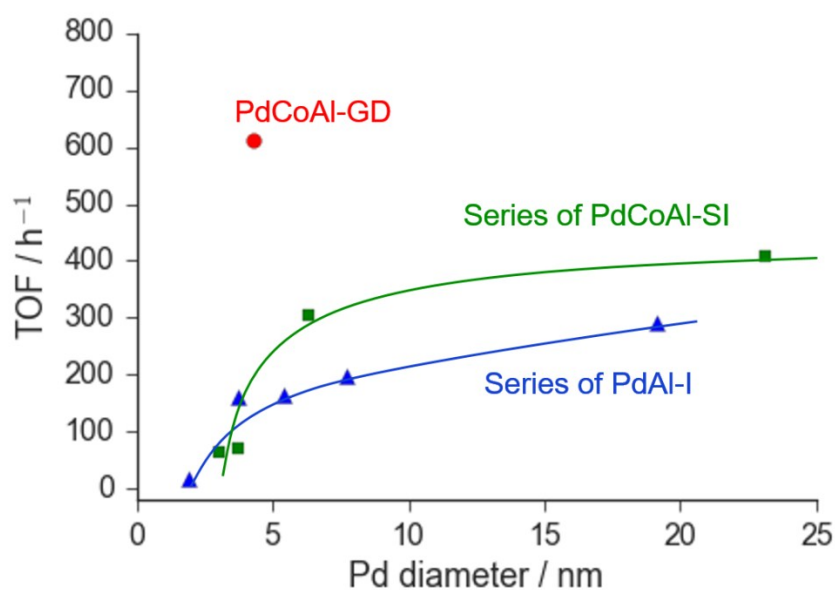

**Figure S2.** Effect of the Pd particle diameter on the methane combustion TOF at 300 °C.

### *X-ray photoelectron spectroscopy (XPS) measurements*

XPS measurements were carried on a JPS-9000MC system (JEOL Ltd.) with a Al  $K\alpha$  radiation. The samples were mounted on a carbon tape. In the analysis, the Shirley equation was used for the background, and the energy position was adjusted with the C 1s XPS spectrum.

As shown in Figure S3, the Co 2p XPS spectra were clearly observed in the PdCoAl-GD and PdCoAl-SI samples. This result indicates that Co species exist near the surface of  $\gamma$ -Al<sub>2</sub>O<sub>3</sub>.

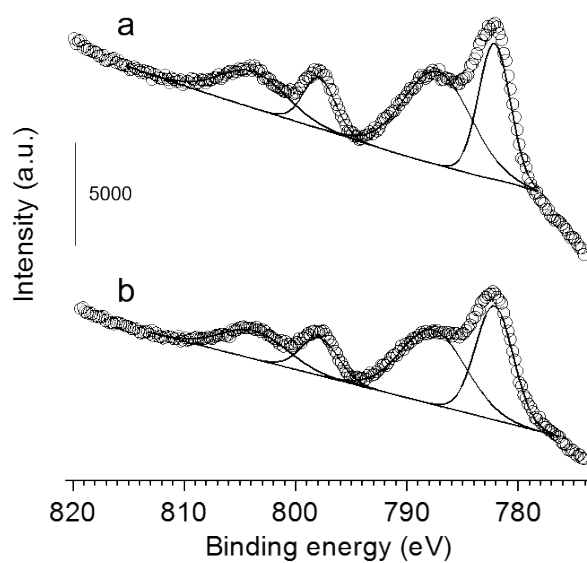

**Figure S3.** Ex situ Co 2d XPS spectra of: (a) PdCoAl-GD and (b) PdCoAl-SI after methane combustion at 600 °C.

*Operando Pd K-edge XAFS measurements*

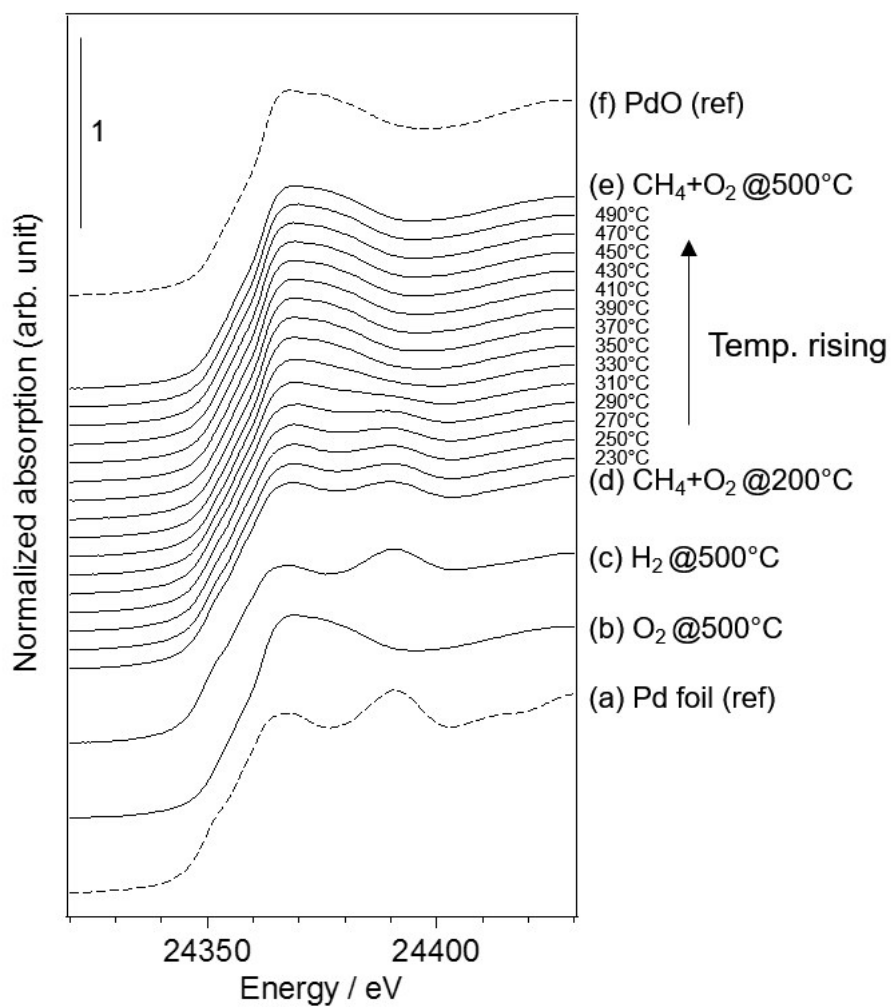

**Figure S4.** Normalized Pd K-edge XANES spectra of PdCoAl-SI during operando XAFS measurements.

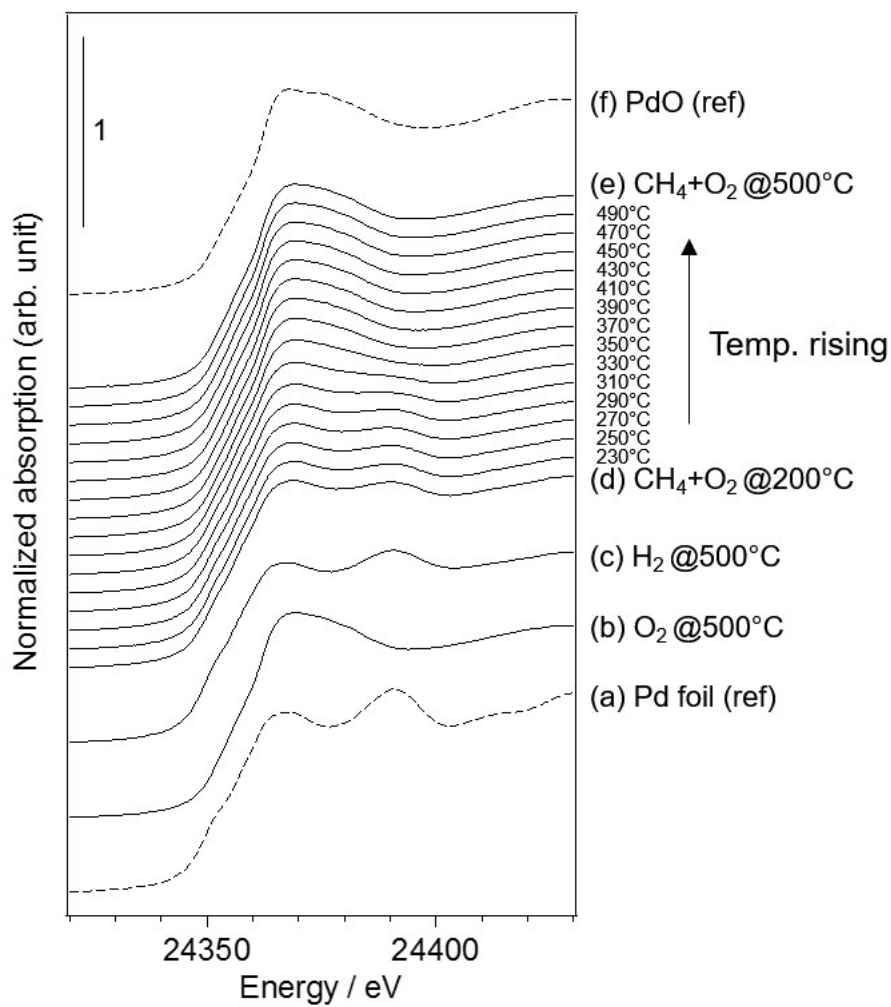

**Figure S5.** Normalized Pd K-edge XANES spectra of PdAl-I during operando XAFS measurements.

In order to examine more general trends, the operando XAFS experiments were carried out over various Pd catalysts.

Al<sub>2</sub>O<sub>3</sub> (JRC-ALO-2, JRC-ALO-5, and JRC-ALO-8) as a support were supplied from the Catalysis Society of Japan. The four new catalysts (Pd/ALO2, Pd/ALO5, Pd/ALO8, and Pd/ALO8-800A) were prepared by an impregnation method using a Pd(NO<sub>3</sub>)<sub>2</sub> solution and Al<sub>2</sub>O<sub>3</sub>, followed by dryness, and calcination in air at 500 °C for 3 h. Pd/Co<sub>3</sub>O<sub>4</sub>/Al<sub>2</sub>O<sub>3</sub> was prepared by a sequential impregnation method as follows. First, Co(NO<sub>3</sub>)<sub>2</sub>·6H<sub>2</sub>O and Al<sub>2</sub>O<sub>3</sub> (Sasol) were mixed and the resulting mixture stirred. After evaporation and drying overnight at 80 °C, the resulting solid was calcined at 500 °C for 3h. The obtained solid and Pd(NO<sub>3</sub>)<sub>2</sub> were mixed and the mixture stirred. After evaporation and drying overnight at 80 °C, the resulting solid was calcined at 500 °C for 3 h, and Pd/Co<sub>3</sub>O<sub>4</sub>/Al<sub>2</sub>O<sub>3</sub> was obtained. The prepared catalysts are listed in Table S2.

**Table S2. List of Pd/Al<sub>2</sub>O<sub>3</sub> and Pd/Co/Al<sub>2</sub>O<sub>3</sub> catalysts with different supports.**

| Catalysts                                                         | Support                                | preparation method      | Calcination    | Pd loading (wt%) | Co loading (wt%) | $d_{\text{Pd-Co}}$ (nm) |
|-------------------------------------------------------------------|----------------------------------------|-------------------------|----------------|------------------|------------------|-------------------------|
| Pd/ALO2                                                           | JRC-ALO-2                              | Impregnation            | 500°C for 3 h  | 2 <sup>a</sup>   | -                | 2.7                     |
| Pd/ALO5                                                           | JRC-ALO-5                              | Impregnation            | 500°C for 3 h  | 2 <sup>a</sup>   | -                | 2.8                     |
| Pd/ALO8                                                           | JRC-ALO-8                              | Impregnation            | 500°C for 3 h  | 2 <sup>a</sup>   | -                | 4.7                     |
| Pd/ALO8-800A                                                      | JRC-ALO-8                              | Impregnation            | 800°C for 10 h | 2 <sup>a</sup>   | -                | 7.1                     |
| Pd/Co <sub>3</sub> O <sub>4</sub> /Al <sub>2</sub> O <sub>3</sub> | Al <sub>2</sub> O <sub>3</sub> (sasol) | Sequential Impregnation | 500°C for 3 h  | 2 <sup>a</sup>   | 5 <sup>a</sup>   | 3.7                     |

<sup>a</sup> Nominal value.

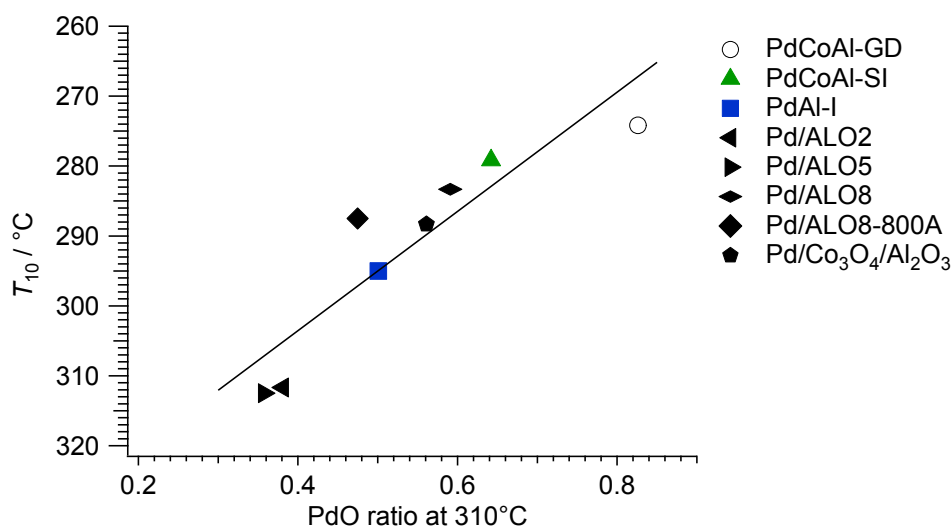

**Figure S6.** Correlation between  $T_{10}$  and the PdO ratio for Pd-based catalysts (Figure 9(d)). The catalysts are listed in Table S2.

*STEM/EDX images of PdCoAl-GD after combustion*

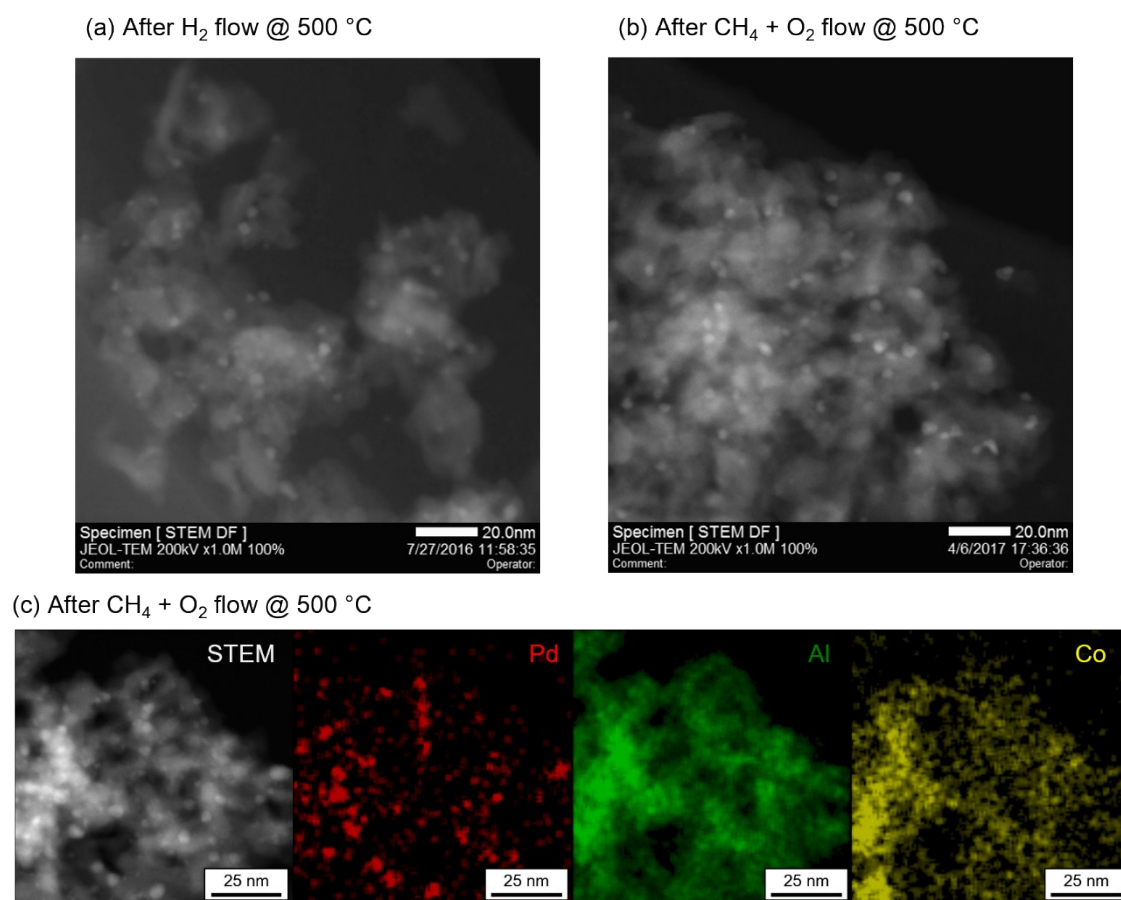

**Figure S7.** HAADF-STEM images of PdCoAl-GD (a) after reduction by H<sub>2</sub> at 500 °C and (b) after methane combustion at 500 °C. (c) HAADF-STEM image and EDX element mapping of PdCoAl-GD after methane combustion at 500 °C.

PdCoAl-GD after combustion showed a structure in which the PdO particles were dispersed on CoAl<sub>2</sub>O<sub>4</sub>, and the catalyst structure remained unchanged except that Pd was oxidized.

### *Pd K-edge XAFS spectra of the catalysts after H<sub>2</sub> treatment at 500 °C*

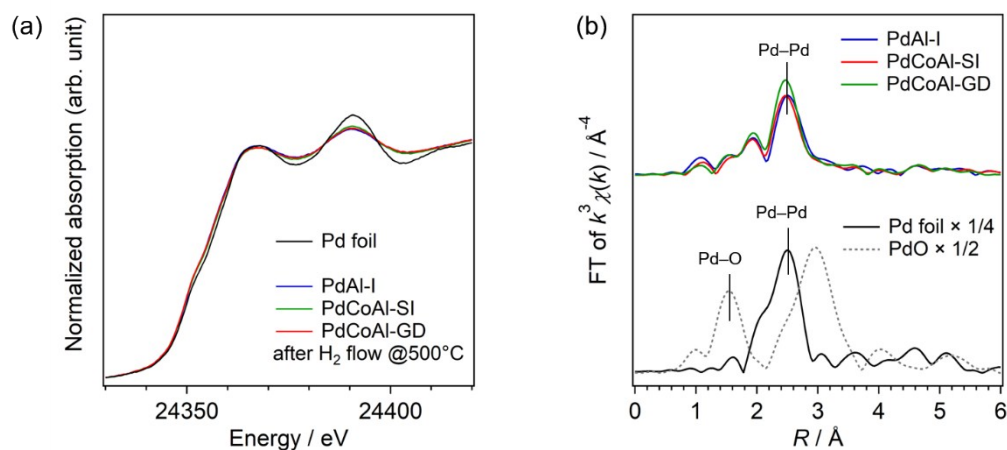

**Figure S8.** (a) the Pd K-edge XANES spectra and (b) the Fourier transformed EXAFS spectra of the H<sub>2</sub> treated catalyst at 500 °C.

All XANES spectra were almost in agreement with Pd foil. A peak derived from the Pd–Pd bond of Pd<sup>0</sup> also appeared from Fourier transformed EXAFS. Conversely, since almost no peaks derived from Pd–O bond of PdO was observed, the treatment at 500 °C under H<sub>2</sub> reduced all Pd species to a metallic phase.

### *Pd 3d XPS spectra of the catalysts*

**Table S3.** Pd<sup>n+</sup> 3d<sub>5/2</sub> binding energies for the catalysts.

| Samples   | Pd <sup>n+</sup> 3d <sub>5/2</sub> B.E. (eV) |
|-----------|----------------------------------------------|
| PdCoAl-GD | 336.1                                        |
| PdCoAl-SI | 336.3                                        |
| PdAl-I    | 336.9                                        |



## REFERENCE

- 1 H. Wang, C. Chen, Y. Zhang, L. Peng, S. Ma, T. Yang, H. Guo, Z. Zhang, D. S. Su and J. Zhang, *Nat. Commun.*, 2015, **6**, 7181.
- 2 M. Cargnello, J. J. D. Jaen, J. C. H. Garrido, K. Bakhmutsky, T. Montini, J. J. C. Gamez, R. J. Gorte and P. Fornasiero, *Science*, 2012, **337**, 713–717.
- 3 X. Pan, Y. Zhang, Z. Miao and X. Yang, *J. Energy Chem.*, 2013, **22**, 610–616.
- 4 Y. Lou, J. Ma, W. Hu, Q. Dai, L. Wang, W. Zhan, Y. Guo, X.-M. Cao, Y. Guo, P. Hu and G. Lu, *ACS Catal.*, 2016, **6**, 8127–8139.
- 5 G. Ercolino, G. Grzybek, P. Stelmachowski, S. Specchia, A. Kotarba and V. Specchia, *Catal. Today*, 2015, **257**, 66–71.
- 6 S. Colussi, A. Gayen, M. F. Camellone, M. Boaro, J. Llorca, S. Fabris and A. Trovarelli, *Angew. Chem. Int. Ed.*, 2009, **48**, 8481–8484.
- 7 Z. Wang, J. Deng, Y. Liu, H. Yang, S. Xie, Z. Wu and H. Dai, *Catal. Today*, 2017, **281**, 467–476.
- 8 Z. Chen, S. Wang, Y. Ding, L. Zhang, L. Lv, M. Wang and S. Wang, *Appl. Catal. A Gen.*, 2017, **532**, 95–104.
- 9 X. Zou, Z. Rui and H. Ji, *ACS Catal.*, 2017, **7**, 1615–1625.
